# Supplementary material
Source: PubMed Central journal article supplement (PMC4884149)
Supplement: NIHMS754453-supplement-01.pdf [file NIHMS754453-supplement-01.pdf]

Supplemental Table I. Multivariate Cox Regression on Survival

|                     | HR   | CI            | P   |
|---------------------|------|---------------|-----|
| Age                 | 0.93 | (0.87, 1.00)  | 0.1 |
| Female Sex          | 0.89 | (0.18, 4.38)  | 0.9 |
| Flap Reconstruction | 0.30 | (0.48, 1.88)  | 0.2 |
| Wound Complication  | 2.93 | (0.82, 10.48) | 0.1 |
| Endovascular Repair | 3.38 | 0.69, 16.70)  | 0.1 |
| Neck Dissection     | 3.08 | (0.95, 10.0)  | 0.1 |
| Any Rebleeding      | 0.45 | (0.11, 1.76)  | 0.3 |
